# Supplementary material
Source: MDPI journal article supplement (https://www.mdpi.com/2073-445X/12/3/627)
Supplement: s1 [file s1]

Table S1: Application of HEC-RAS/HMS in flood hazard assessment in the urban area of South Asian cities

| Author                                                                               | Location                                    | Objective of Study                                                   | Models/method/software                                                       | Data used                                                                   | Findings                                                                    |
|--------------------------------------------------------------------------------------|---------------------------------------------|----------------------------------------------------------------------|------------------------------------------------------------------------------|-----------------------------------------------------------------------------|-----------------------------------------------------------------------------|
| (Pathak et al., 2020); (Zope et al., 2016); (Zope et al., 2015); (Zope et al., 2017) | Mumbai city, India                          | Investigated the impact of LULC and urbanization on floods           | HEC-HMS and HEC-RAS, SCS-CN, GIS, and remote sensing                         | Daily time series of precipitation and temperature, land use, soil map, DEM | Develop flood hazard maps of the city                                       |
| (Suriya & Mudgal, 2012)                                                              | Thirusoolam sub watershed in Chennai, India | To develop the flood hazard map                                      | 1D HEC- RAS, HEC-HMS, weighted curve number, Google Earth image, RS, and GIS | Land use, hydrologic soil group data                                        | Urbanization has increased the flooded area and depth                       |
| (Devi et al., 2019)                                                                  | Adyar River basin, Chennai, India           | Flood simulations using freely available hydrologic-hydraulic models | HEC-HMS, 2D HEC-RAS, CA-based model, Artificial Neural Network model         | Landsat images, one-day maximum rainfall data, SRTM DEM 30m,                | Developed Flood inundation and hazard zonation for the future extreme event |
| (Vinay Ashok Rangari, Umamahesh, et al.,                                             | Hyderabad, India                            | Developing flood zone map for urban catchment                        | HEC-HMS, HEC-RAS, SCS CN method, AutoCAD, ArcGIS 10.1, Google Maps           | Hourly rainfall & evaporation data, drainage                                | Development of flood hazard risk map for different                          |

|                                                                             |                                          |                                                                                                            |                                                                                         |                                                                                                                                                |                                                                                                                    |
|-----------------------------------------------------------------------------|------------------------------------------|------------------------------------------------------------------------------------------------------------|-----------------------------------------------------------------------------------------|------------------------------------------------------------------------------------------------------------------------------------------------|--------------------------------------------------------------------------------------------------------------------|
| 2021)                                                                       |                                          |                                                                                                            |                                                                                         | network,<br>SRTM 30 m<br>DEM, DTM,<br>hydrologic<br>soil group                                                                                 | climate<br>change<br>scenarios                                                                                     |
| (Vinay<br>Ashok<br>Rangari,<br>Bhatt, et al.,<br>2021)                      | Hyderabad,<br>India                      | Analyze the<br>urban<br>floods of<br>October<br>2020 from a<br>geospatial<br>perspective                   | HEC-RAS 1D–2D,<br>HEC-HMS, ArcGIS<br>10.1                                               | Rainfall data,<br>stream–<br>drainage<br>network,<br>Cartosat<br>DEM 10 m,<br>Landsat 30 m<br>and Sentinel-<br>2 (10 m<br>resolution)<br>image | Haphazard<br>urbanization<br>ignoring the<br>hydrologica<br>l landscape<br>has worsen<br>the flooding<br>severity. |
| (Surwase &<br>Manjusree,<br>2019)                                           | Hyderabad,<br>India                      | Assessing<br>three<br>different<br>modeling<br>approaches<br>for the<br>simulation<br>of urban<br>flooding | PCSWMM, HEC-RAS<br>2D, HAND, Dynamic<br>Wave (DW) model,<br>Curve Number (CN)<br>method | CARTODE<br>M 10-meter<br>resolution,<br>hourly<br>rainfall data,<br>discharge<br>data                                                          | Delineation<br>of flood<br>plains and<br>risk zones<br>for<br>protection<br>from<br>flooding                       |
| (Azazkhan<br>I. Pathan &<br>Agnihotri,<br>2020),<br>(Azazkhan<br>Ibrahimkha | Navasari<br>city of<br>Gujarat,<br>India | Assessment<br>of flood<br>inundation<br>in an urban<br>coastal area                                        | HEC-RAS 1D, HEC-<br>RAS 2D, Arc GIS                                                     | Cartosat-1<br>DEM, SRTM<br>30 m DEM,<br>Discharge<br>data, SAR<br>images                                                                       | Generated<br>flood map<br>shows low-<br>lying areas<br>of the city<br>are prone to                                 |

|                          |                      |                                                             |                                                         |                                                           |                                                                                                         |
|--------------------------|----------------------|-------------------------------------------------------------|---------------------------------------------------------|-----------------------------------------------------------|---------------------------------------------------------------------------------------------------------|
| n Pathan et al., 2021)   |                      |                                                             |                                                         |                                                           | flooding.                                                                                               |
| (Saini et al., 2016)     | Ambala city, India   | Examine the issues and causes of flooding in the urban area | HEC- RAS v4.1, Google Earth, GIS                        | Cartosat-1 (30 m) DEM, flow data, land use map            | Flooding impact starts at a maximum discharge of 1000 m <sup>3</sup> /s against a 5-year return period. |
| (Pandey & Dugar, 2019)   | Bhaktapur, Nepal     | Flood hazard and inundation mapping                         | HEC-RAS v5.0.7, ARCGIS                                  | DEM, survey data, daily precipitation, and discharge data | Flood hazard maps created using hydraulic and topographic modeling                                      |
| (Basnet, 2020)           | Tulsipur city, Nepal | Prepare floodplain mapping                                  | HEC RAS, Google Earth, ArcGIS                           | 30m DEM, Landsat images, flow, and cross sections data    | Flooding in the buildup area has increased with urbanization along the river                            |
| (Basnet & Acharya, 2019) | Pokhara, Nepal       | To conduct the flood analysis of                            | HEC-RAS modeling, Google Earth Map, ArcGIS, photographs | 30 m resolution DEM,                                      | Flood plain maps are prepared                                                                           |

|                           |                        |                                                                  |                                                  |                                                                             |                                                           |
|---------------------------|------------------------|------------------------------------------------------------------|--------------------------------------------------|-----------------------------------------------------------------------------|-----------------------------------------------------------|
|                           |                        | the Seti River in Ramghat                                        |                                                  |                                                                             |                                                           |
| (Dangol & Bormudoi, 2015) | Bishnumati , Kathmandu | To prepare a flood hazard map                                    | 1D HEC-RAS, ArcView                              | 30 m ASTER DEM, Daily maximum river discharge, GIS data, socioeconomic data | Flood area increases with flood intensity                 |
| (Zafar & Zaidi, 2019)     | Karachi, Pakistan      | Identify the impact of land-use changes on associated flood risk | 1D HEC-RAS HEC-HMS, SCS-CN, ArcGIS, Google Earth | Landsat images, SRTM 30m DEM, Topographic maps, daily rainfall data         | Maps of blockages and flood extent were prepared          |
| (Masood & Takeuchi, 2012) | Dhaka, Bangladesh      | Assessment of flood hazards by developing a flood hazard map     | 1D HEC-RAS, ArcGIS, Google Earth                 | DigitalGlobe image, SRTM 90 m DEM, discharge and water level data           | A flood hazard, vulnerability, and risk map were prepared |
| (Tenzin & Bhaskar, 2017)  | Sarpang town, Bhutan   | Modeling the flash flood concerning rainfall                     | HEC-RAS 5.0.1, ArcGIS 9.2                        | SRTM DEM, Landsat images, the daily average rainfall                        | The modeling method adopted can be used for mountain      |

|                       |                   |                                                                                |                 |                                                         |                                                            |
|-----------------------|-------------------|--------------------------------------------------------------------------------|-----------------|---------------------------------------------------------|------------------------------------------------------------|
|                       |                   |                                                                                |                 |                                                         | terrain                                                    |
| (Manawi et al., 2020) | Kabul Afghanistan | Hydrological modeling for the identification of the factors causing the floods | HEC-HMS, ArcGIS | CHIRPS rainfall data, daily rainfall data, CORONA image | Large changes in land use generates floods in recent years |

Table S2: Application of SWMM/PCSWMM in flood hazard assessment in the urban area of South Asian cities

| Author                       | Location              | Objective of Study                                                 | Models/method/software                                  | Data used                                                                                 | Findings                                                                           |
|------------------------------|-----------------------|--------------------------------------------------------------------|---------------------------------------------------------|-------------------------------------------------------------------------------------------|------------------------------------------------------------------------------------|
| (V. A. Rangari et al., 2018) | Hyderabad city, India | Identifying highly affected areas during extreme rainfalls event   | 1D-SWMM, ArcGIS 10.1                                    | 10m Cartosat Dem, details of drain network                                                | Flood inundation maps identify the low-lying areas which need immediate attention. |
| (Vemula et al., 2018)        | Hyderabad City, India | Assess conveyance capacity of urban sewerage network under climate | SWMM 5.1, 2D PCSWMM, ARCGIS, Google Earth maps, InpPINS | CMIP5, RCPs 2.6, 4.5, 6.0, and 8.5, daily rainfall, Storm Water Network, Cartosat 30M DEM | Drainage conveyance capacity can be increased by desilting                         |

|                                    |                            |                                                                                         |                                            |                                                                                                                                  |                                                                                                 |
|------------------------------------|----------------------------|-----------------------------------------------------------------------------------------|--------------------------------------------|----------------------------------------------------------------------------------------------------------------------------------|-------------------------------------------------------------------------------------------------|
|                                    |                            | change scenario                                                                         |                                            |                                                                                                                                  | drains and outlets                                                                              |
| (Vinay Ashok Rangari et al., 2018) | Warangal, Telangana, India | Analyzing and designing a suitable stormwater drainage system                           | SWMM model, IDF curves, ArcGIS             | Cartosat 30 m DEM, LULC maps, drainage details                                                                                   | By enlarging the drainage system, water surcharge conditions at intersections can be decreased. |
| (Avinash et al., 2018)             | Bangalore city India       | Develop flood forecast and early warning system                                         | SWMM, InpPINS tool                         | 2 m resolution DEM, Land use land cover map, real-time hydro-meteorological data                                                 | The flood extent maps with forecast rainfall are generated                                      |
| (Harsha et al., 2020a, 2020b)      | Vijayawada city, India     | To model flood using extreme rainfall events for historical and future climate scenario | SWMM model, AutoCAD, GIS, RCP 4.5 scenario | Junctions and conduits of sub-catchments, data of extreme rainfall events for historical and future, Sentinel and Landsat images | Prepared flood map help to understand the flood extend area                                     |

|                              |                             |                                                                                     |                                          |                                                                                              |                                                                                              |
|------------------------------|-----------------------------|-------------------------------------------------------------------------------------|------------------------------------------|----------------------------------------------------------------------------------------------|----------------------------------------------------------------------------------------------|
| (Bhattacharjee et al., 2021) | Bhubaneswar City, India     | To assess urban flood risks based on hydro-dynamic set-up and level of urbanization | NRCS-SCS CN method, SWMM model           | LiDAR data (1 m), LULC, 1m CartoDEM, hourly and daily rainfall, SWD network data, IDF curves | Model simulations indicate the severity of urban floods in the city                          |
| (Bisht et al., 2016)         | IIT Kharagpur, India        | Providing a solution to stormwater management problem in an urbanized area          | 1D SWMM and 2D MIKE URBAN models, ARCGIS | Daily rainfall data, land use/land cover, topographic map, dem 10M                           | Extreme rainfall for short period is supposed to result in flooding from any drainage system |
| (Sonavane et al., 2020)      | Pune city, India            | Develop and simulate urban floods using critical rainfall events                    | SWMM 5.1 model, ArcGIS                   | Hourly rainfall data, 30m DEM SRTM, drainage and catchment data                              | Extreme rain intensities cannot be handled by the current drainage system.                   |
| (Akter et al., 2019)         | Chittagong city, Bangladesh | Model urban flood hazards and map the estimated inundation                          | 2D PCSWMM, ArcGISv10.1                   | 30 m DEM, drainage details, landuse, daily rainfall data                                     | Model simulated flood depths were used                                                       |

|                                       |                                              |                                                                                                                  |                                  |                                                                                                   |                                                                                                                       |
|---------------------------------------|----------------------------------------------|------------------------------------------------------------------------------------------------------------------|----------------------------------|---------------------------------------------------------------------------------------------------|-----------------------------------------------------------------------------------------------------------------------|
|                                       |                                              | depth for a data-scarce city                                                                                     |                                  |                                                                                                   | to prepare the flood hazard map                                                                                       |
| (Ahammad et al., 2018)                | Begunbari canal catchment, Dhaka, Bangladesh | To find the requirement of pumping and retention area capacity for a different storm event                       | GeoSWMM, GIS                     | 10 m DEM, Land use, Canal cross sections, Water Level, Discharge, and 3-hourly precipitation data | To maintain the specified water level, 55 cumec capacity pumps with a 1.5 square kilometer retention area are needed. |
| (Pradhan-Salike & Raj Pokharel, 2017) | Kathmandu , Nepal                            | Investigates the link between climate change-related extreme rainfall events and rising urban flooding caused by | PCSWMM, RClimdex, IDF curve, GIS | Precipitation and land use data, map of urban drainage, geology                                   | Future climate change conditions with present urbanization will increase pluvial flooding                             |



|                   |                  |                                                                                   |                                                |                                                          |                                                         |
|-------------------|------------------|-----------------------------------------------------------------------------------|------------------------------------------------|----------------------------------------------------------|---------------------------------------------------------|
|                   |                  | increased imperviousness.                                                         |                                                |                                                          |                                                         |
| (Kc et al., 2021) | Kathmandu, Nepal | to access the impact of climate change and urbanization on urban pluvial flooding | PCSWMM 2D, Regional Climate Models (RCMs), GIS | IDF curve, daily and hourly rainfall, 5m DEM, 1m contour | Urbanization on contributes less to urban pluvial flood |

Table S3: Application of MIKE in flood hazard assessment in the urban area of South Asian cities

| Author                  | Location                                | Objective of Study                                                                                      | Models/method/software                                 | Data used                                                                           | Findings                                                                                          |
|-------------------------|-----------------------------------------|---------------------------------------------------------------------------------------------------------|--------------------------------------------------------|-------------------------------------------------------------------------------------|---------------------------------------------------------------------------------------------------|
| (Pervin et al., 2020)   | Bharatpur, Nepal and Sylhet, Bangladesh | Understand the risks of flooding due to inadequate drainage capacity and unplanned solid waste dumping. | MIKE11, CNRM ARPEGE climate model                      | Drainage networks, rainfall and water level data, surveyed cross-sections of canals | A structural solution and proper solid waste management are required to reduce the flooding risk. |
| (Wagenaar et al., 2019) | Colombo, Sri Lanka                      | Risk analysis techniques are combined to evaluate adaptation                                            | MIKE, Unit Hydrograph method, SCS-CN method, IDF curve | Land use map, rainfall data, DEM, cross sections, road and                          | The effect of stopping wetland encroachment was found to                                          |

|                         |                           |                                                                                  |                                |                                                    |                                                                                                                                   |
|-------------------------|---------------------------|----------------------------------------------------------------------------------|--------------------------------|----------------------------------------------------|-----------------------------------------------------------------------------------------------------------------------------------|
|                         |                           | measures                                                                         |                                | embankment data                                    | be larger than the effect of the structural adaptation measures                                                                   |
| (Moufar & Perera, 2018) | Colombo, Sri Lanka        | To assess the flood level and extent of inundations for design rainfalls         | MIKE11, MIKE21, and MIKE FLOOD | Rainfall data of 15 min, Water level, 30 m DEM     | 2.0 MSL is the safety flood level in the basin and was satisfied only with the 10-year rainfall event under favorable conditions. |
| (Mark et al., 2018)     | Central Dhaka, Bangladesh | Linking dynamic urban flood modeling with quantitative microbial risk assessment | MIKE, time area model          | Grid size 10m, storm sewer pipes, and box culverts | to understand the interaction between urban flood and health risks caused by direct human contact with the flood water            |

|                           |                   |                                                                                                                  |                                   |                                                                                  |                                                                                                                                                                     |
|---------------------------|-------------------|------------------------------------------------------------------------------------------------------------------|-----------------------------------|----------------------------------------------------------------------------------|---------------------------------------------------------------------------------------------------------------------------------------------------------------------|
| (Khan et al., 2018)       | Dhaka, Bangladesh | To investigates the consequences of the 2004, flood that would take place in 2050 under rapid urban development. | MIKE flood, time–area method      | LULC, DEM 25m, primary drainage system data, cross sections of the open channels | The damage will increase significantly if the 2004 flood event occurs in 2050.                                                                                      |
| (A. S. Chen et al., 2016) | Dhaka, Bangladesh | To assesses the flood hazard and damage due to current and future urbanization.                                  | MIKE Urban, MOUSE, and MIKE FLOOD | Rainfall, water level, land use data                                             | The modeling results demonstrate the capability of the damage assessment tools to evaluate the impact of flooding on the current and future urban growth scenarios. |
